# Supplementary material for: Impact of a preceding radiotherapy on the outcome of immune checkpoint inhibition in metastatic melanoma: a multicenter retrospective cohort study of the DeCOG
Source: PubMed Central journal article supplement — J Immunother Cancer. 2020 May 5;8(1):e000395. doi: 10.1136/jitc-2019-000395 (PMC7228559; doi:10.1136/jitc-2019-000395), 2020-05-05
Supplement: jitc-2019-000395supp003.pdf [file jitc-2019-000395supp003.pdf]

**SUPPLEMENTARY MATERIALS - ONLINE ONLY**

*To the research article:*

**Impact of a preceding radiotherapy on the outcome of immune checkpoint inhibition in advanced metastatic melanoma: a multicenter retrospective cohort study of the DeCOG**

**Sarah Knispel<sup>1</sup>, Andreas Stang<sup>2</sup>, Lisa Zimmer<sup>1</sup>, Hildegard Lax<sup>2</sup>, Ralf Gutzmer<sup>3</sup>, Lucie Heinzerling<sup>4</sup>, Carsten Weishaupt<sup>5</sup>, Claudia Pföhler<sup>6</sup>, Anja Gesierich<sup>7</sup>, Rudolf Herbst<sup>8</sup>, Katharina C. Kähler<sup>9</sup>, Benjamin Weide<sup>10</sup>, Carola Berking<sup>11</sup>, Carmen Loquai<sup>12</sup>, Jochen Utikal<sup>13</sup>, Patrick Terheyden<sup>14</sup>, Martin Kaatz<sup>15</sup>, Max Schlaak<sup>11,16</sup>, Alexander Kreuter<sup>17</sup>, Jens Ulrich<sup>18</sup>, Peter Mohr<sup>19</sup>, Edgar Dippel<sup>20</sup>, Elisabeth Livingstone<sup>1</sup>, Jürgen C. Becker<sup>1,21</sup>, Michael Weichenthal<sup>9</sup>, Eleftheria Chorti<sup>1</sup>, Janine Gronewold<sup>22</sup>, Dirk Schadendorf<sup>1</sup>, Selma Ugurel<sup>1\*</sup>**

<sup>1</sup>Department of Dermatology, University Hospital Essen, University of Duisburg-Essen, Essen, Germany

<sup>2</sup>Centre of Clinical Epidemiology, Institute for Medical Informatics, Biometry and Epidemiology, University of Duisburg-Essen, Essen, Germany

<sup>3</sup>Skin Cancer Center Hannover, Department of Dermatology, Hannover Medical School, Hannover, Germany

<sup>4</sup>Department of Dermatology, University Hospital Erlangen, Erlangen, Germany

<sup>5</sup>Department of Dermatology, University Hospital Münster, Münster, Germany

<sup>6</sup>Department of Dermatology, Saarland University Medical Center, Homburg/Saar, Germany

<sup>7</sup>Department of Dermatology, University Hospital Würzburg, Würzburg, Germany

<sup>8</sup>Department of Dermatology, Helios Klinikum Erfurt, Erfurt, Germany

<sup>9</sup>Department of Dermatology, University Hospital Kiel, Kiel, Germany

<sup>10</sup>Department of Dermatology, University Hospital Tübingen, Tübingen, Germany

<sup>11</sup>Department of Dermatology, Ludwig-Maximilians University Munich, Munich, Germany

<sup>12</sup>Department of Dermatology, University Medical Center Mainz, Mainz, Germany

<sup>13</sup>Skin Cancer Unit, German Cancer Research Center (DKFZ) and Department of Dermatology, Venereology and Allergology, University Medical Center Mannheim, Ruprecht-Karl University of Heidelberg, Mannheim, Germany

<sup>14</sup>Department of Dermatology, University Hospital Lübeck, Lübeck, Germany

<sup>15</sup>Department of Dermatology, Wald-Klinikum Gera, Gera, Germany

<sup>16</sup>Department of Dermatology, Skin Cancer Center at CIO Koeln/Bonn, University Hospital Cologne, Cologne, Germany

<sup>17</sup>Department of Dermatology, Helios St. Elisabeth Hospital Oberhausen, University of Witten-Herdecke, Oberhausen, Germany

<sup>18</sup>Department of Dermatology, Klinikum Quedlinburg, Quedlinburg, Germany

<sup>19</sup>Department of Dermatology, Elbe-Klinikum Buxtehude, Buxtehude, Germany

<sup>20</sup>Department of Dermatology, Klinikum Ludwigshafen, Ludwigshafen, Germany

<sup>21</sup>Translational Skin Cancer Research, Deutsches Konsortium für Translationale Krebsforschung (DKTK), Essen, Germany

<sup>22</sup>Department of Neurology, University Hospital Essen, University of Duisburg-Essen, Essen, Germany

**Supplementary Table 1.** Covariate distribution after re-weighting with IPTW

|                                                              | Anti-CTLA-4 (n=596) |                 | Anti-PD-1 (n=239) |                  | All patients with preceding RT (n=235) |                          |
|--------------------------------------------------------------|---------------------|-----------------|-------------------|------------------|----------------------------------------|--------------------------|
|                                                              | No preceding RT %   | Preceding RT %  | No preceding RT % | Preceding RT %   | RT last before ICI %                   | RT not last before ICI % |
| <b>Primary site</b>                                          |                     |                 |                   |                  |                                        |                          |
| Skin                                                         | 76.6                | 75.5            | 69.1              | 66.5             | 74.7                                   | 77.5                     |
| Occult (MUP)                                                 | 12.9                | 10.2            | 19.3              | 20.0             | 16.5                                   | 16.7                     |
| Mucosa                                                       | 7.1                 | 8.6             | 10.3              | 12.2             | 6.5                                    | 4.9                      |
| Uvea                                                         | 3.4                 | 5.7             | 1.3               | 1.4              | 2.3                                    | 0.9                      |
| <b>BRAF V600 mutational status</b>                           |                     |                 |                   |                  |                                        |                          |
| Wildtype                                                     | 65.2                | 63.1            | 70.6              | 67.0             | 61.4                                   | 59.4                     |
| Mutation                                                     | 34.8                | 36.9            | 29.4              | 33.0             | 38.6                                   | 40.6                     |
| <b>M stage</b>                                               |                     |                 |                   |                  |                                        |                          |
| M1a (skin, LN)                                               | 9.5                 | 6.0             | 6.9               | 12.5             | 4.2                                    | 3.2                      |
| M1b (lung)                                                   | 24.6                | 25.5            | 22.5              | 22.3             | 9.1                                    | 10.1                     |
| M1c (other organ)                                            | 37.8                | 39.2            | 37.6              | 33.1             | 29.2                                   | 29.5                     |
| M1d (brain)                                                  | 28.2                | 29.3            | 32.6              | 26.9             | 57.4                                   | 57.1                     |
| <b>Bone metastases</b>                                       |                     |                 |                   |                  |                                        |                          |
| No                                                           | 77.8                | 75.9            | 73.3              | 79.9             | 67.7                                   | 64.6                     |
| Yes                                                          | 22.2                | 24.1            | 26.7              | 20.1             | 32.3                                   | 35.4                     |
| <b>Systemic pre-treatment in stage IV</b>                    |                     |                 |                   |                  |                                        |                          |
| No                                                           | 27.9                | 29.9            | 12.9              | 10.7             | 16.8                                   | 14.4                     |
| Yes                                                          | 72.1                | 70.1            | 87.1              | 89.3             | 83.2                                   | 85.6                     |
| <b>Duration of stage IV disease at start of ICI (months)</b> |                     |                 |                   |                  |                                        |                          |
| Median (p10; p90)                                            | 6.7 (0.9; 28.7)     | 7.4 (0.8; 31.7) | 12.6 (2.3; 34.2)  | 15.5 (2.7; 41.9) | 11.0 (2.3; 32.7)                       | 10.5 (2.5; 43.8)         |

This table shows the distribution of covariates after re-weighting according to inverse probability treatment weighting (IPTW). M stage categories refer to the AJCC-v8 classification system; systemic pre-treatment describes systemic therapies received by the patient for inoperable stage IV disease (not adjuvant) prior to the investigated immune checkpoint inhibition (ICI) therapy. RT, radiotherapy; MUP, melanoma of unknown primary; p10, 10<sup>th</sup> percentile; p90, 90<sup>th</sup> percentile.

**Supplementary Table 2.** Covariate distribution after re-weighting with IPTW in patients with brain metastasis

|                                                              | Patients with brain metastasis (n=223) |                           |
|--------------------------------------------------------------|----------------------------------------|---------------------------|
|                                                              | No preceding RT (n=86)<br>%            | Preceding RT (n=137)<br>% |
| <b>Primary site</b>                                          |                                        |                           |
| Skin                                                         | 77.0                                   | 76.9                      |
| Occult (MUP)                                                 | 18.0                                   | 17.4                      |
| Mucosa                                                       | 2.9                                    | 2.7                       |
| Uvea                                                         | 2.1                                    | 3.1                       |
| <b>BRAF V600 mutational status</b>                           |                                        |                           |
| Wildtype                                                     | 50.6                                   | 52.1                      |
| Mutation                                                     | 49.4                                   | 47.9                      |
| <b>Systemic pre-treatment in stage IV</b>                    |                                        |                           |
| No                                                           | 23.1                                   | 22.4                      |
| Yes                                                          | 76.9                                   | 77.6                      |
| <b>Duration of stage IV disease at start of ICI (months)</b> |                                        |                           |
| Median (p10; p90)                                            | 8.7<br>(2.3; 24.7)                     | 8.4<br>(1.9; 32.5)        |

This table shows the distribution of covariates after re-weighting according to inverse probability treatment weighting (IPTW) in all patients with brain metastasis treated with anti-CTLA-4 or anti-PD-1. M stage categories refer to the AJCC v8 classification system; systemic pre-treatment describes systemic therapies received by the patient for inoperable stage IV disease (not adjuvant) prior to the investigated immune checkpoint inhibition (ICI) therapy. RT, radiotherapy; MUP, melanoma of unknown primary; p10, 10<sup>th</sup> percentile; p90, 90<sup>th</sup> percentile.

**Supplementary Table 3.** Systemic pre-treatment in stage IV

|                                          | Anti-CTLA-4 (n=596) |      |              |      | Anti-PD-1 (n=239) |      |              |      | All (n=835)     |      |              |      |
|------------------------------------------|---------------------|------|--------------|------|-------------------|------|--------------|------|-----------------|------|--------------|------|
|                                          | No preceding RT     |      | Preceding RT |      | No preceding RT   |      | Preceding RT |      | No preceding RT |      | Preceding RT |      |
|                                          | n                   | %    | n            | %    | n                 | %    | n            | %    | n               | %    | n            | %    |
| <b>Total</b>                             | 446                 | 100  | 150          | 100  | 154               | 100  | 85           | 100  | 600             | 100  | 235          | 100  |
| <b>Systemic pre-treatment (PreT)</b>     |                     |      |              |      |                   |      |              |      |                 |      |              |      |
| No                                       | 138                 | 30.9 | 27           | 18.0 | 28                | 18.2 | 11           | 13.0 | 166             | 27.7 | 38           | 16.2 |
| Yes                                      | 291                 | 65.2 | 123          | 82.0 | 123               | 79.8 | 72           | 84.7 | 414             | 69.0 | 195          | 83.0 |
| Missing data                             | 17                  | 3.9  | 0            | 0.0  | 3                 | 2.0  | 2            | 2.3  | 20              | 3.3  | 2            | 0.8  |
| <b>PreT containing chemotherapy</b>      |                     |      |              |      |                   |      |              |      |                 |      |              |      |
| No                                       | 237                 | 53.1 | 55           | 36.7 | 88                | 57.1 | 49           | 57.6 | 325             | 54.2 | 104          | 44.3 |
| Yes                                      | 209                 | 46.9 | 95           | 63.3 | 66                | 42.9 | 36           | 42.4 | 275             | 45.8 | 131          | 55.7 |
| DTIC monotherapy                         | 129                 | 28.9 | 43           | 28.7 | 34                | 22.1 | 9            | 10.6 | 163             | 27.2 | 52           | 22.2 |
| Combination chemotherapy                 | 55                  | 12.3 | 34           | 22.7 | 32                | 20.8 | 26           | 30.6 | 87              | 14.5 | 60           | 25.5 |
| Other monotherapy                        | 21                  | 4.7  | 16           | 10.7 | 0                 | 0.0  | 1            | 1.2  | 21              | 3.5  | 17           | 7.2  |
| Isolated liver chemoperfusion            | 4                   | 0.9  | 2            | 1.4  | 0                 | 0.0  | 0            | 0.0  | 4               | 0.7  | 2            | 0.8  |
| <b>PreT containing kinase inhibitors</b> |                     |      |              |      |                   |      |              |      |                 |      |              |      |
| No                                       | 340                 | 76.2 | 109          | 72.6 | 114               | 74.0 | 54           | 63.5 | 454             | 75.7 | 163          | 69.4 |
| Yes                                      | 106                 | 23.8 | 41           | 27.3 | 40                | 26.0 | 31           | 36.5 | 146             | 24.3 | 72           | 30.6 |
| BRAF inhibitor monotherapy               | 53                  | 11.9 | 22           | 14.7 | 27                | 17.5 | 18           | 21.2 | 80              | 13.3 | 40           | 17.0 |
| MEK inhibitor monotherapy                | 12                  | 2.7  | 2            | 1.3  | 3                 | 2.0  | 3            | 3.5  | 15              | 2.5  | 5            | 2.1  |
| Other monotherapy                        | 23                  | 5.2  | 7            | 4.7  | 2                 | 1.3  | 2            | 2.4  | 25              | 4.2  | 9            | 3.8  |
| BRAF + MEK inhibition                    | 10                  | 2.2  | 7            | 4.6  | 7                 | 4.6  | 5            | 5.9  | 17              | 2.8  | 12           | 5.1  |
| More than one therapy line               | 7                   | 1.6  | 3            | 2.0  | 1                 | 0.6  | 3            | 3.5  | 8               | 1.3  | 6            | 2.6  |
| <b>PreT containing immunotherapy</b>     |                     |      |              |      |                   |      |              |      |                 |      |              |      |
| No                                       | 429                 | 96.2 | 141          | 94.0 | 32                | 20.8 | 15           | 17.6 | 461             | 76.8 | 156          | 66.4 |
| Yes                                      | 17                  | 3.8  | 9            | 6.0  | 122               | 79.1 | 70           | 82.4 | 139             | 23.2 | 79           | 33.6 |
| CTLA-4 antibodies                        | 0                   | 0.0  | 0            | 0.0  | 122               | 79.2 | 70           | 82.4 | 122             | 20.3 | 70           | 29.8 |
| PD-1 antibodies                          | 0                   | 0.0  | 0            | 0.0  | 0                 | 0.0  | 0            | 0.0  | 0               | 0.0  | 0            | 0.0  |
| Others                                   | 17                  | 3.8  | 9            | 6.0  | 0                 | 0.0  | 0            | 0.0  | 17              | 2.8  | 9            | 3.8  |
| <b>PreT lines</b>                        |                     |      |              |      |                   |      |              |      |                 |      |              |      |
| 0                                        | 157                 | 33.7 | 31           | 20.7 | 31                | 13.0 | 15           | 17.6 | 188             | 31.3 | 46           | 19.6 |
| 1                                        | 248                 | 55.6 | 95           | 63.3 | 37                | 24.0 | 13           | 15.3 | 285             | 47.5 | 108          | 55.0 |
| 2                                        | 39                  | 8.7  | 22           | 14.7 | 67                | 43.5 | 47           | 55.3 | 106             | 17.7 | 69           | 29.4 |
| 3                                        | 2                   | 0.4  | 2            | 1.3  | 19                | 12.3 | 10           | 11.8 | 21              | 3.5  | 12           | 5.1  |
| <b>Number of PreT lines (mean)</b>       | 0.7                 |      | 1.0          |      | 1.5               |      | 1.6          |      | 0.9             |      | 1.2          |      |

Pre-treatments (PreT) refer to systemic treatment lines given prior to the investigated immune checkpoint inhibition therapy. Percentages are given per column for each individual patient cohort. Some patients received more than one pre-treatment strategy, therefore numbers do not necessarily add up to 100%. RT, radiotherapy; DTIC, dacarbazine.

**Supplementary Table 4.** Characteristics of radiotherapy

|                                                                | Anti-CTLA-4 (n=596) |       | Anti-PD-1 (n=239) |       | All (n=835) |       |
|----------------------------------------------------------------|---------------------|-------|-------------------|-------|-------------|-------|
|                                                                | n                   | %     | n                 | %     | n           | %     |
| <b>Radiotherapy (RT)</b>                                       |                     |       |                   |       |             |       |
| No                                                             | 446                 | 74.8  | 154               | 64.4  | 600         | 71.9  |
| Yes                                                            | 150                 | 25.2  | 85                | 35.6  | 235         | 28.1  |
| <b>Target of RT (as % of patients with RT)</b>                 |                     |       |                   |       |             |       |
| Brain                                                          | 65                  | 43.3  | 35                | 41.2  | 100         | 42.6  |
| Lungs                                                          | 3                   | 2.0   | 9                 | 10.6  | 12          | 5.1   |
| Bone                                                           | 26                  | 17.3  | 16                | 18.8  | 42          | 17.9  |
| Lymph nodes                                                    | 28                  | 18.7  | 14                | 16.5  | 42          | 17.9  |
| Skin                                                           | 4                   | 2.7   | 6                 | 7.1   | 10          | 4.3   |
| Abdominal organs                                               | 5                   | 3.3   | 3                 | 3.5   | 8           | 3.4   |
| Soft tissue                                                    | 10                  | 6.7   | 5                 | 5.9   | 15          | 6.4   |
| unknown                                                        | 22                  | 14.7  | 11                | 12.9  | 33          | 14.0  |
| <b>Timing of RT (as % of patients with RT)</b>                 |                     |       |                   |       |             |       |
| Last before ICI                                                | 85                  | 56.7  | 42                | 49.4  | 127         | 54.0  |
| Earlier in stage IV                                            | 65                  | 43.3  | 43                | 50.6  | 108         | 46.0  |
| <b>RT of the brain (as % of patients with RT of the brain)</b> |                     |       |                   |       |             |       |
| Total                                                          | 65                  | 100.0 | 35                | 100.0 | 100         | 100.0 |
| Whole brain radiation                                          | 30                  | 46.2  | 14                | 40.0  | 44          | 44.0  |
| Stereotactic radiotherapy                                      | 22                  | 33.8  | 11                | 31.4  | 33          | 33.0  |
| RT of brain metastases, not further specified                  | 13                  | 20.0  | 10                | 28.6  | 23          | 23.0  |

Radiotherapies (RT) were applied in stage IV prior to the investigated immune checkpoint inhibitor therapy. Percentages are given per column for each individual patient cohort. Some patients received radiotherapies of more than one target, therefore numbers do not necessarily add up to 100%.

## SUPPLEMENTARY FIGURE LEGENDS

**Supplementary Figure 1.** Directed acyclic graphs (DAGs) used to determine the confounding covariates for the survival adjustment sets of this study. The exposure of interest is marked in green (preceding radiotherapy, yes versus no); covariates are marked in light blue; confounders are marked in orange. Interactions between covariates are indicated by arrows. DAGs were build for **(A)** progression-free survival, and **(B)** overall survival in the total patient cohort, as well as **(C)** progression-free survival, and **(D)** overall survival in the subgroup of patients with brain metastases at start of ICI. The resulting confounders are **(A)** brain metastases (yes versus no), bone metastases (yes versus no), primary site of disease (categorical), systemic pre-treatment (yes versus no), **(B)** duration in stage IV (continuous), brain metastases (yes versus no), bone metastases (yes versus no), primary site of disease (categorical), BRAF V600 mutational status (yes versus no), and systemic pre-treatment (yes versus no), **(C)** primary site of disease (categorical), systemic pre-treatment (yes versus no), and **(D)** duration in stage IV (continuous), primary site of disease (categorical), BRAF V600 mutational status (yes versus no), and systemic pre-treatment (yes versus no).

**Supplementary Figure 2.** Kaplan-Meier curves showing the probability of progression-free **(A, B)** and overall survival **(C, D)** adjusted for confounding factors in 239 melanoma patients treated with anti-PD-1 immune checkpoint inhibitors (ICI), subdivided by preceding radiotherapy (RT). **A, C**, n=192 patients treated with anti-CTLA-4 prior to anti-PD-1 ICI; **B, D**, n=45 patients not treated with anti-CTLA-4 prior to anti-PD-1 ICI. HR, hazard ratio; CI, confidence interval.
