# Supplementary figures and images for: Impact of a preceding radiotherapy on the outcome of immune checkpoint inhibition in metastatic melanoma: a multicenter retrospective cohort study of the DeCOG
Source: PubMed Central journal article supplement — J Immunother Cancer. 2020 May 5;8(1):e000395. doi: 10.1136/jitc-2019-000395 (PMC7228559; doi:10.1136/jitc-2019-000395), 2020-05-05

Knispel S et al.: Supplementary Figure 1

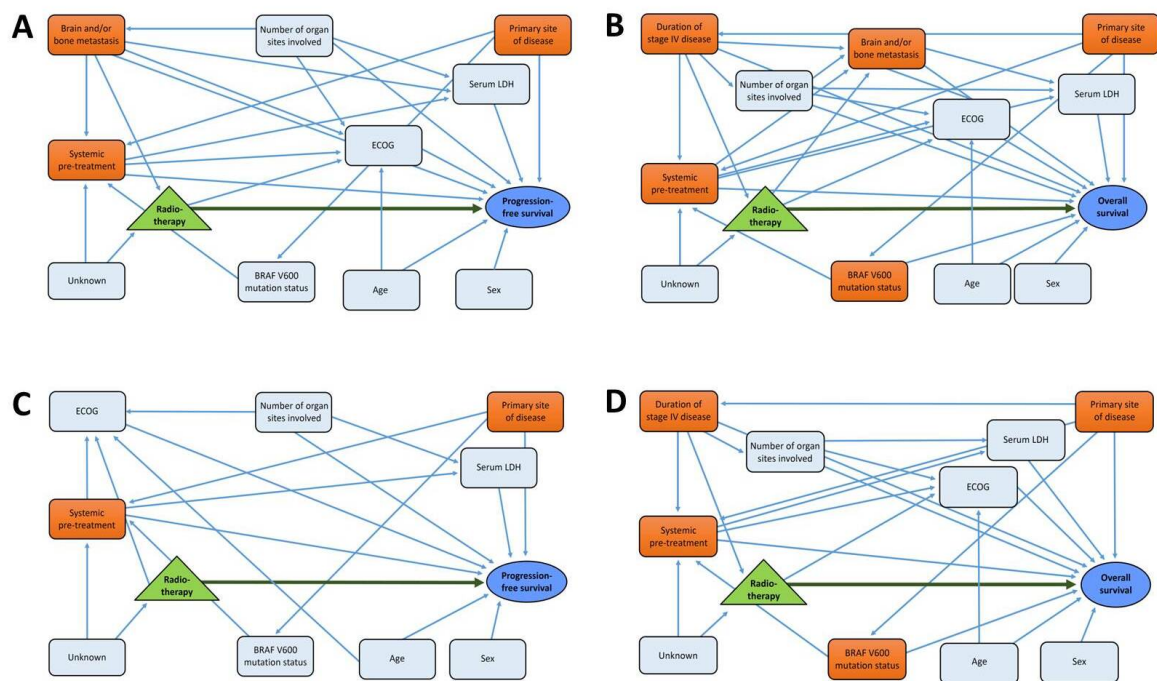

Supplement: jitc-2019-000395supp001.pdf [file jitc-2019-000395supp001.pdf]

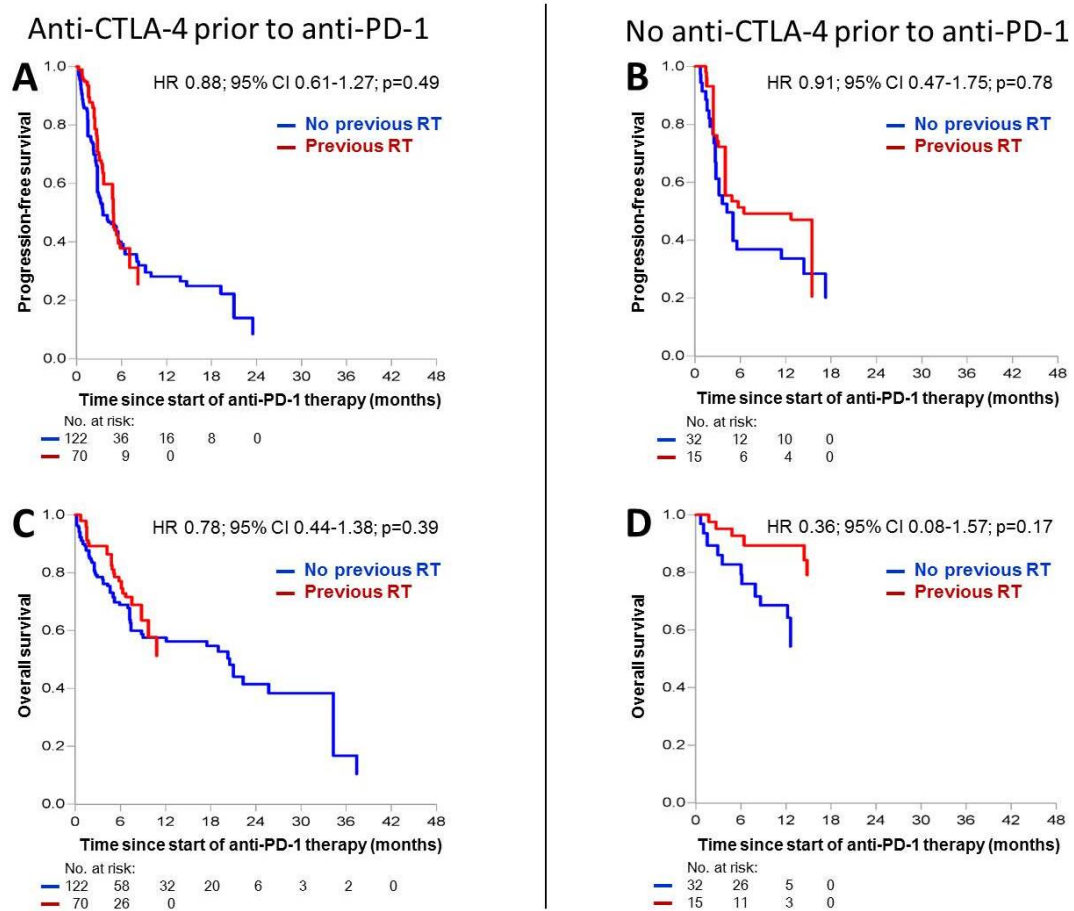

Supplement: jitc-2019-000395supp002.pdf [file jitc-2019-000395supp002.pdf]
